# Supplementary material for: Impact of COVID-19 national lockdown on asthma exacerbations: interrupted time-series analysis of English primary care data
Source: HighWire-hosted journal article supplement (doi:10.1136/thoraxjnl-2020-216512), 2021-03-29
Supplement: thoraxjnl-2020-216512supp001_data_supplement.pdf [file thoraxjnl-2020-216512supp001_data_supplement.pdf]

11","7A45.15","7A45.00","7A45.14","7A13.00","7A13z00","7A13y00","8H2T.00","7700400","9239",  
 "9b0K.00","945Z.00","945..00","13F8.11","9b0L.00","13F8.00","9R6..00","7936500","8HN1.00","8H  
 NA.00","8HNB.00","8HNC.00","8HND.00","8HNE.00","8HN2.00","8HN3.00","8HN4.00","8HN5.00","  
 8HN6.00","8HN7.00","8HN8.00","8HN9.00","8HN0.00","8HNZ.00","8CO..00","Z177800","8A8..00","  
 8Hb..00","8HM4.00","8HMB.00","8HM3.00","8HME.00","8HMJ.00","8HM8.00","8HM1.00","8HMG.  
 00","8HM7.00","8HMO.00","8HM5.00","8HM6.00","8HML.00","8HMN.00","8HMD.00","8HMH.00",  
 "8HMQ.00","8HMK.00","8HMM.00","8HM2.00","8HMP.00","8HM9.00","8HMC.00","8HMA.00","8H  
 MR.00","8HM..00","8HMZ.00","8HMF.00","13F8100","13FS.00","66Yi.00","8H32.00","7701.11","8H  
 3E.00","8H3V.00","8H3T.00","8H3I.00","8H3O.00","8H39.00","8H3B.00","8H3M.00","8H3I.00","8H  
 3..00","8H36.00","8H3I.00","8H3S.00","8H3C.00","8H3G.00","8H3U.00","8H3D.00","8H3A.00","8H3  
 N.00","8H38.00","8H3Q.00","8H3L.00","8H3R.00","8H3P.00","8H3H.00","8H37.00","8H3F.00","8H3  
 K.00","7A47.11","7A47.12","7A47.13","7A47.16","7A47.00","7A47z00","7A47y00","7A47.14","7A15  
 .00","7A47.15","8H3Z.00","7700y00","7259y00","7B07y00","7513y00","9b8C.00","949B.00","9495"  
 ,"9144","9N19.11","7B07.00","7B07z00","T772.00","9b8A.00","8HLP.00","8HKP.00","8HJI.00","8HC  
 1.00","8H63.00","ZL51.11","8HC3.00","8H7a.00","8HD..00","8HC..00","8HCZ.00","ZL56.11","ZL51.0  
 0","ZL56100","ZL51.13","8HTF.00","ZL56.00","ZL56211","ZL56200","8HX1.00","9H4..00","9H5..00",  
 "ZL96.11","ZL91.00","ZL96111","ZL96100","ZL91.12","ZL96211","ZL96200","ZL9GQ00","9N04.00","  
 9N1y300","9N19.00","9N1B.00","8HJ..00","8HJZ.00","8HF..12","7A13411","ZL16.11","ZL11.00","ZL1  
 6111","ZL16100","ZL11.12","ZL16.00","ZL16211","ZL16200","8HX0.00","8Ha..00","7A11211","ZV29  
 300","ZV29211","ZV29200"

**Specific asthma codes previously validated to identify asthma patients in primary care**

"H33..","663..","H333..","H33z1","H33z0","H33..","H330..","663V1","663V3","663V0","H331..","H33z.  
 ","H33zz","H33z0","H331..","H3300","H3120","173A..","H3301","8H2P..","H330..","663P..","663U..","6  
 63N..","H330..","H33z1","9OJA..","663y..","66Y5..","66Y9..","66YJ..","8B3j..","663j..","1O2..","H33z2","66  
 3V..","663V2","663N2","66YK..","H3300","H330..","H33zz","8795","8794","66YA..","8796","H3311","6  
 6YQ..","663p..","663n..","9OJA..","8798","8797","H33zz","173c..","663d..","8791","663u..","663e..","8CR  
 0..","663s..","663v..","663f..","663e1","663e0","H3301","H3310","66YR..","663N0","66YP..","663t..","66  
 3O0","663w..","663x..","663N1","H35y7","663r..","H334..","1780","66YC..","663q..","H3312","H330z","  
 9OJ1..","663m..","H47y0","H3311","173d..","H35y6","388t..","38DL..","8CMA0","679J0","38DT..","9NN  
 X..","679J1","66Yp..","38DV..","1787","1781","66Yr..","66Yq..","1789","663P0","178B..","663P1","1783  
 ","679J2","1786","66Ys..","388t0","1788","178A..","1785","1784","1782","663P2","661N1","661M1"  
 ,"H335..","66Yu.."
