# Supplementary material for: Impact of COVID-19 national lockdown on asthma exacerbations: interrupted time-series analysis of English primary care data
Source: HighWire-hosted journal article supplement (doi:10.1136/thoraxjnl-2020-216512), 2021-03-29
Supplement: thoraxjnl-2020-216512supp001_data_supplement.pdf [file thoraxjnl-2020-216512supp001_data_supplement.pdf]

## **Appendix 1 (Read Codes to Define Outcome)**

### **Asthma exacerbation**

Xa1hD","Xafdy","Xafdz","Xafdj","XE0YW","XM0s2","X101y","X1022","H333","H3301","H3311","H33z0","H33z1

### **Asthma hospitalization or Accident & Emergency visit**

"663d","8H2P","663m."

### **Oral corticosteroids**

"fe6..","fe3..","fe31.,"fe32.,"fe33.,"fe36.,"fe37.,"fe3A.,"fe3B.,"fe3C.,"fe3r.,"fe3s.,"fe3u.,"fe e4..","fe41.,"fe42.,"fe43.,"fe44.,"fe45.,"fe4e.,"fe4f.,"fe4g.,"fe4h.,"fe5..","fe51.,"fe52.,"fe5 3.,"fe5f.,"fe5m.,"fe5n.,"fe5o.,"fe5p.,"fe61.,"fe62.,"fe64.,"fe65.,"fe66.,"fe67.,"fe68.,"fe6 9.,"fe6a.,"fe6c.,"fe6d.,"fe6e.,"fe6f.,"fe6g.,"fe6h.,"fe6i.,"fe6j.,"fe6k.,"fe6l.,"fe6m.,"fe6n.," fe6o.,"fe6p.,"fe6q.,"fe6r.,"fe6s.,"fe6t.,"fe6v.,"fe6w.,"fe6z.,"fe7..","fe71.,"fe72.,"fe73.,"f e74.,"fe75.,"fe76.,"fe77.,"fe78.,"fe79.,"fe7x.,"fe7y.,"fe7z.,"x00yP","x01Mh","x01Na","x01N b","fe11.,"fe12.,"fe1x.,"fe1y.,"fe21.,"fe22.,"fe23.,"fe24.,"fe25.,"fe26.,"x01MW"

### **Evidence of lower respiratory review**

"XE1P1","XE2Nb","XE2b5","XM0rv","XM0s2","XM1Bs","XM1QV","XM1QX","XSCET","Xa0Y7","Xa0IY ","Xa0IZ","Xa1hD","Xa35I","Xa7nL","Xa7nM","Xa7nN","Xa7nP","Xa7nT","Xa7nU","Xa8Hn","Xa9Z7"," Xa9zF","XaBE9","XaBM8","XaBfJ","XaDcD","XaDcV","XaDsa","XaDtB","XaDtP","XaDth","XaDtI","XaD vK","XaDvL","XaEFy","XaEFz","XaEIV","XaEIV","XaEIV","XaF6d","XaF6e","XaFrU","XaFrV","XaFrW"," XaFrX","XaIW","XaIX","XaIY","XaIZ","XaIND","XaINZ","XaINa","XaINb","XaINc","XaINd","XaINf","X aINg","XaINh","XaIQ2","XaIQ3","XaIQ4","XaIQD","XaIQE","XaIQg","XaIR3","XaIU","XaIU","XaIUm"," XaIUn","XaIUo","XaIeq","Xaler","Xalet","Xalfk","XaloE","Xalu5","Xalu6","XaluG","Xalww","XalxQ"," XalxR","XalxU","XalxV","XaJ3K","XaJ9B","XaJ9C","XaJ9D","XaJ9E","XaJEL","XaJFG","XaKdk","XaLIm" ,"XaLin","XaLlr","XaLJO","XaLJS","XaLJT","XaLJU","XaLPE","XaMeu","XaN4a","XaNKw","XaObi","XaO bj","XaObk","XaObl","XaObm","XaPpl","XaQHq","XaQig","XaQih","XaQmR","XaQmS","XaQmT","Xa QmU","XaREU","XaRFi","XaRFj","XaRFk","XaRFI","XaVx3","XaX3n","XaXCa","XaXCb","XaXZm","XaXZ p","XaXZs","XaXZu","XaXZx","XaXa0","XaXeg","XaY2V","XaYYt","XaYYu","XaYZB","XaYZh","XaYb8"," XaYby","XaYja","XaYmL","XaYpC","XaYpF","XaZ1k","XaZ1l","XaZd1","XaZyl","XaZyt","XaZyu","XaZz1 ","Xaa7B","Xaa7C","Xaa7Q","Xaafd","XaahD","Xab2f","Xab4X","ZV19L","ZV725","ZV74B","ZV7B3"," "c74.."

### **Additional non-asthma specific codes for hospitalisation**

"8HJJ.00","9b8D.00","8HX..00","8HX2.00","8Hd..00","8H16.00","8H2R.00","8H29.00","8H2D.00","8 H2J.00","8H24.00","8H26.00","8H2H.00","8H2Z.00","8H21.00","8H2E.00","8H2N.00","8H27.00","8 H2B.00","8H2K.00","8H28.00","8H25.00","8H2I.00","8H23.00","8H2L.00","8H2G.00","8H2M.00","8 H2C.00","8H22.00","8H1..11","8H15.00","8H1Z.00","8H1..00","8H14.00","8H13.00","8H12.00","8H 2A.00","8H2F.00","SP31100","663m.00","66Yd.00","9b8B.00","9498","8HG..11","9451","L398400"," 8HG..00","ZLD2G11","ZLD2100","ZLD2H11","ZLD2H00","ZLD2111","ZLD2G00","ZLD2I11","ZLD2100 ","ZLE1.00","ZLE5111","ZLE5100","ZLE1.11","ZLF2.00","ZLE5.00","ZLE5200","ZLG6.00","ZLG6100","Z LG6400","ZLG6500","8HE8.00","8HE..00","8HE2.00","8HN..00","7A10000","7A15000","7A12000","7 A41400","7A47800","7A47200","7A47000","7A47600","7A47400","7A47C00","7A41000","7A41200 ","7A15300","7A41600","7A47B00","7A47300","7A47700","7A47100","7A47D00","8H23000","7A11 000","7A11200","7A45300","7A13400","7A13000","7A45200","7A45000","7A40000","7A13300","7 A45700","7A45D00","7A13100","66Ye.00","8H2P.00","7700.11","7700300","663d.00","7F13300"," 7700100","7700000","7700","7700z00","7700200","7A41211","8H2..00","8712","7M30000","7A13.

11","7A45.15","7A45.00","7A45.14","7A13.00","7A13z00","7A13y00","8H2T.00","7700400","9239",  
"9b0K.00","945Z.00","945..00","13F8.11","9b0L.00","13F8.00","9R6..00","7936500","8HN1.00","8H  
NA.00","8HNB.00","8HNC.00","8HND.00","8HNE.00","8HN2.00","8HN3.00","8HN4.00","8HN5.00","  
8HN6.00","8HN7.00","8HN8.00","8HN9.00","8HN0.00","8HNZ.00","8CO..00","Z177800","8A8..00","  
8Hb..00","8HM4.00","8HMB.00","8HM3.00","8HME.00","8HMJ.00","8HM8.00","8HM1.00","8HMG.  
00","8HM7.00","8HMO.00","8HM5.00","8HM6.00","8HML.00","8HMN.00","8HMD.00","8HMH.00",  
"8HMQ.00","8HMK.00","8HMM.00","8HM2.00","8HMP.00","8HM9.00","8HMC.00","8HMA.00","8H  
MR.00","8HM..00","8HMZ.00","8HMF.00","13F8100","13FS.00","66Yi.00","8H32.00","7701.11","8H  
3E.00","8H3V.00","8H3T.00","8H3I.00","8H3O.00","8H39.00","8H3B.00","8H3M.00","8H3I.00","8H  
3..00","8H36.00","8H3I.00","8H3S.00","8H3C.00","8H3G.00","8H3U.00","8H3D.00","8H3A.00","8H3  
N.00","8H38.00","8H3Q.00","8H3L.00","8H3R.00","8H3P.00","8H3H.00","8H37.00","8H3F.00","8H3  
K.00","7A47.11","7A47.12","7A47.13","7A47.16","7A47.00","7A47z00","7A47y00","7A47.14","7A15  
.00","7A47.15","8H3Z.00","7700y00","7259y00","7B07y00","7513y00","9b8C.00","949B.00","9495"  
,"9144","9N19.11","7B07.00","7B07z00","T772.00","9b8A.00","8HLP.00","8HKP.00","8HJI.00","8HC  
1.00","8H63.00","ZL51.11","8HC3.00","8H7a.00","8HD..00","8HC..00","8HCZ.00","ZL56.11","ZL51.0  
0","ZL56100","ZL51.13","8HTF.00","ZL56.00","ZL56211","ZL56200","8HX1.00","9H4..00","9H5..00",  
"ZL96.11","ZL91.00","ZL96111","ZL96100","ZL91.12","ZL96211","ZL96200","ZL9GQ00","9N04.00","  
9N1y300","9N19.00","9N1B.00","8HJ..00","8HJZ.00","8HF..12","7A13411","ZL16.11","ZL11.00","ZL1  
6111","ZL16100","ZL11.12","ZL16.00","ZL16211","ZL16200","8HX0.00","8Ha..00","7A11211","ZV29  
300","ZV29211","ZV29200"

**Specific asthma codes previously validated to identify asthma patients in primary care**

"H33..","663..","H333..","H33z1","H33z0","H33..","H330..","663V1","663V3","663V0","H331..","H33z.  
","H33zz","H33z0","H331..","H3300","H3120","173A..","H3301","8H2P..","H330..","663P..","663U..","6  
63N..","H330..","H33z1","9OJA..","663y..","66Y5..","66Y9..","66YJ..","8B3j..","663j..","1O2..","H33z2","66  
3V..","663V2","663N2","66YK..","H3300","H330..","H33zz","8795","8794","66YA..","8796","H3311","6  
6YQ..","663p..","663n..","9OJA..","8798","8797","H33zz","173c..","663d..","8791","663u..","663e..","8CR  
0..","663s..","663v..","663f..","663e1","663e0","H3301","H3310","66YR..","663N0","66YP..","663t..","66  
3O0","663w..","663x..","663N1","H35y7","663r..","H334..","1780","66YC..","663q..","H3312","H330z","  
9OJ1..","663m..","H47y0","H3311","173d..","H35y6","388t..","38DL..","8CMA0","679J0","38DT..","9NN  
X..","679J1","66Yp..","38DV..","1787","1781","66Yr..","66Yq..","1789","663P0","178B..","663P1","1783  
","679J2","1786","66Ys..","388t0","1788","178A..","1785","1784","1782","663P2","661N1","661M1"  
,"H335..","66Yu.."
