# Supplementary material for: Impact of COVID-19 national lockdown on asthma exacerbations: interrupted time-series analysis of English primary care data
Source: HighWire-hosted journal article supplement (doi:10.1136/thoraxjnl-2020-216512), 2021-03-29
Supplement: thoraxjnl-2020-216512supp002_data_supplement.pdf [file thoraxjnl-2020-216512supp002_data_supplement.pdf]

## Appendix 2

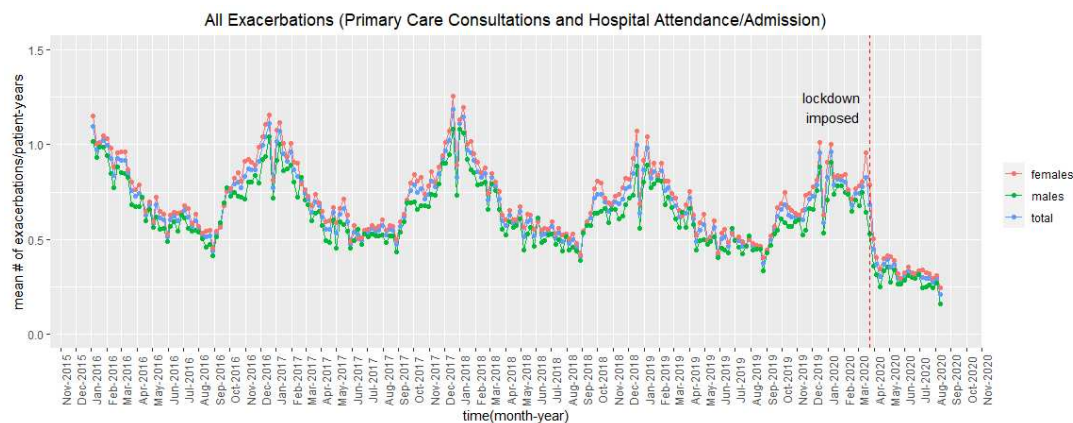

Figure S1: Mean exacerbation rate for every week, from January 2016 - August 2020 across England stratified by gender

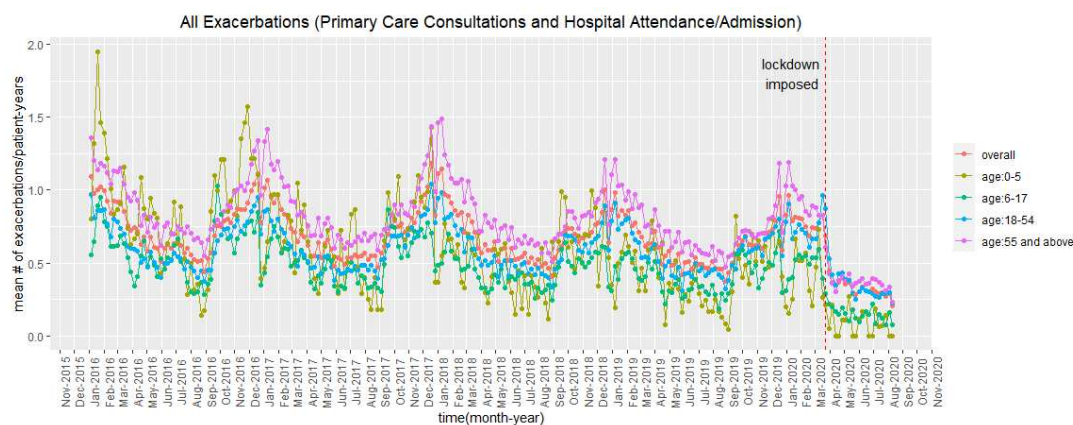

Figure S2: Mean exacerbation rate for every week, from January 2016 - August 2020 across England stratified by age group

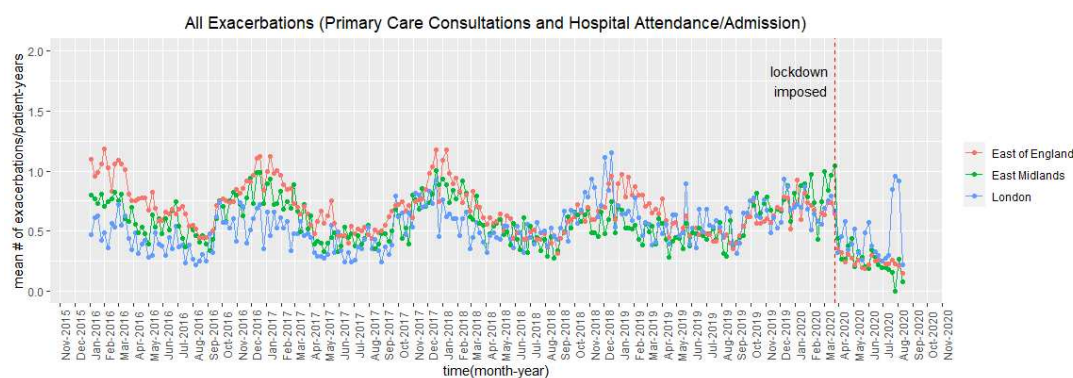

Figure S3: Mean exacerbation rate for every week, from January 2016 - August 2020 across England stratified by region (East of England, East Midlands, London)

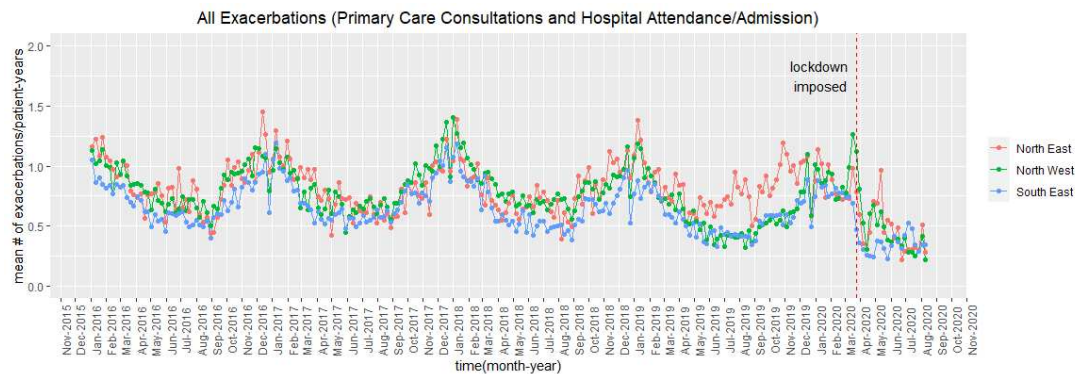

Figure S4: Mean exacerbation rate for every week, from January 2016 - August 2020 across England stratified by region (North East, North West, South East)

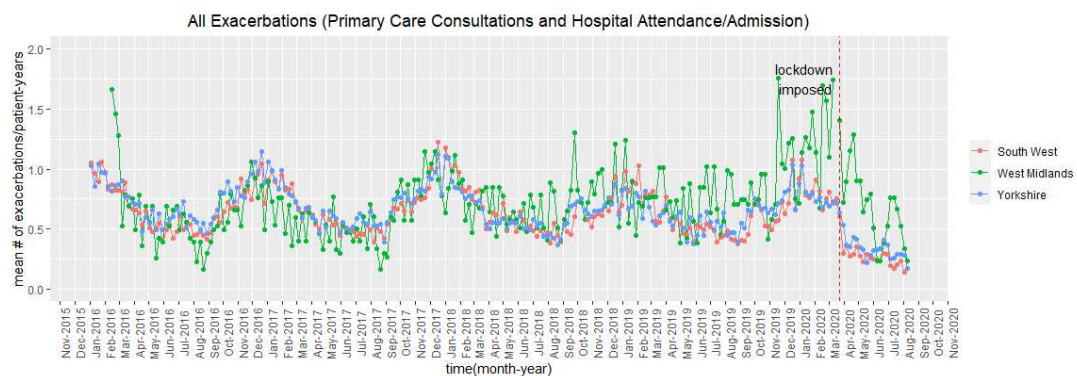

Figure S5: Mean exacerbation rate for every week, from January 2016 - August 2020 across England stratified by region (South West, West Midlands, Yorkshire)
